# Supplementary material for: Disparities in the potentially avoidable use of emergency services by citizenship: a two-year cross-sectional study in Italy
Source: Research Square preprint supplement (doi:10.21203/rs.3.rs-8680399/v1), 2026-02-13
Supplement: Supplementary file 1 [file 9712f6105ab1cd97c11dba9d.docx]

**Supplementary Information**

**Disparities in the potentially avoidable use of emergency services by citizenship: a two-year cross-sectional study in Italy**

Elvira Massaro1†, Alexander Domnich2†, Giancarlo Icardi1,2, Andrea Orsi1,2, Filippo Ansaldi1,2, Lucia Martines1, Matteo Astengo2, Daniela Amicizia1,2 and Donatella Panatto1*

1Department of Health Sciences (DISSAL), University of Genoa, Genoa, Italy

2IRCCS Azienda Ospedaliera Metropolitana, Genoa, Italy

†Elvira Massaro and Alexander Domnich contributed equally to this work.

*Correspondence: Donatella Panatto, panatto@unige.it

**Table S1** STROBE (strengthening the reporting of observational studies in epidemiology) checklist for cross-sectional studies

|  | Item No | Recommendation | Reported in section/subsection (§) |
| --- | --- | --- | --- |
| **Title and abstract** | 1 | (a) Indicate the study’s design with a commonly used term in the title or the abstract | Title; Abstract |
| (b) Provide in the abstract an informative and balanced summary of what was done and what was found | Abstract |
| Introduction | | |  |
| Background/rationale | 2 | Explain the scientific background and rationale for the investigation being reported | Introduction (1–3) |
| Objectives | 3 | State specific objectives, including any prespecified hypotheses | Introduction (3) |
| Methods | | |  |
| Study design | 4 | Present key elements of study design early in the paper | Methods/Study design and setting (1) |
| Setting | 5 | Describe the setting, locations, and relevant dates, including periods of recruitment, exposure, follow-up, and data collection | Methods/Study design and setting (2, 3); Methods/Data source and eligibility criteria (1) |
| Participants | 6 | (a) Give the eligibility criteria, and the sources and methods of selection of participants | Methods/Data source and eligibility criteria (1, 2) |
| Variables | 7 | Clearly define all outcomes, exposures, predictors, potential confounders, and effect modifiers. Give diagnostic criteria, if applicable | Methods/Study outcome (1); Methods/Study variables (1, 2) |
| Data sources/ measurement | 8 | For each variable of interest, give sources of data and details of methods of assessment (measurement). Describe comparability of assessment methods if there is more than one group | Study design and setting (3); Methods/Study outcome (1); Methods/Study variables (1, 2) |
| Bias | 9 | Describe any efforts to address potential sources of bias | Methods/Data source and eligibility criteria (2) |
| Study size | 10 | Explain how the study size was arrived at | Methods/Study outcome (1); Methods/Data source and eligibility criteria (2) |
| Quantitative variables | 11 | Explain how quantitative variables were handled in the analyses. If applicable, describe which groupings were chosen and why | Methods/Statistical analysis (1) |
| Statistical methods | 12 | (a) Describe all statistical methods, including those used to control for confounding | Methods/Statistical analysis (1) |
| (b) Describe any methods used to examine subgroups and interactions | Methods/Statistical analysis (1) |
| (c) Explain how missing data were addressed | Methods/Study variables (2) |
| (d) If applicable, describe analytical methods taking account of sampling strategy | Not applicable |
| (e) Describe any sensitivity analyses | Methods/Study outcome (1) |
| Results | | |  |
| Participants | 13 | (a) Report numbers of individuals at each stage of study—e.g. numbers potentially eligible, examined for eligibility, confirmed eligible, included in the study, completing follow-up, and analyzed | Results/Description of the study population (1); Results/Effects of citizenship on non-urgent emergency department accesses (1) |
| (b) Give reasons for non-participation at each stage | Results/Effects of citizenship on non-urgent emergency department accesses (1) |
| (c) Consider use of a flow diagram | Fig. 1 |
| Descriptive data | 14* | (a) Give characteristics of study participants (e.g. demographic, clinical, social) and information on exposures and potential confounders | Results/Description of the study population (1, 2); Table 1 |
| (b) Indicate number of participants with missing data for each variable of interest | Results/Effects of citizenship on non-urgent emergency department accesses (1) |
| Outcome data | 15* | Report numbers of outcome events or summary measures | Results/Effects of citizenship on non-urgent emergency department accesses (2); Fig. 1; Fig. 2 |
| Main results | 16 | (a) Give unadjusted estimates and, if applicable, confounder-adjusted estimates and their precision (e.g., 95% confidence interval). Make clear which confounders were adjusted for and why they were included | Results/Effects of citizenship on non-urgent emergency department accesses (2, 5); Table 2; Table S2; Table S3 |
| (b) Report category boundaries when continuous variables were categorized | Not applicable |
| (c) If relevant, consider translating estimates of relative risk into absolute risk for a meaningful time period | Not applicable |
| Other analyses | 17 | Report other analyses done—e.g. analyses of subgroups and interactions, and sensitivity analyses | Results/Effects of citizenship on non-urgent emergency department accesses (3–5); Table 2; Fig. 2; Fig. 3; Fig. 4; Table S4; Table S5 |
| Discussion | | |  |
| Key results | 18 | Summarize key results with reference to study objectives | Discussion (1) |
| Limitations | 19 | Discuss limitations of the study, taking into account sources of potential bias or imprecision. Discuss both direction and magnitude of any potential bias | Discussion (5) |
| Interpretation | 20 | Give a cautious overall interpretation of results considering objectives, limitations, multiplicity of analyses, results from similar studies, and other relevant evidence | Discussion (5) |
| Generalizability | 21 | Discuss the generalizability (external validity) of the study results | Discussion (2–5); Conclusions (1) |
| Other information | | |  |
| Funding | 22 | Give the source of funding and the role of the funders for the present study and, if applicable, for the original study on which the present article is based | Funding |

**Table S2** Multivariable logistic regression analysis of the association between foreign citizenship and potentially avoidable emergency department access; Liguria (Italy), 2023–2024 (*N* = 859,206). Main analysis based the narrow definition of the discharge severity priority codes (non-urgency codes only)

| **Variable/parameter** | **Model 1 a** | | **Model 2 b** | | **Model 3 c** | |
| --- | --- | --- | --- | --- | --- | --- |
| ***b* (SE)** | **OR (95% CI)** | ***b* (SE)** | **OR (95% CI)** | ***b* (SE)** | **OR (95% CI)** |
| Intercept | –3.302 (0.008)*** | – | –3.713 (0.044)*** | – | –3.695 (0.045)*** | – |
| Citizenship (foreign vs. Italian) | 0.455 (0.014)*** | 1.577 (1.535–1.620) | 0.485 (0.014)*** | 1.625 (1.580–1.671) | 0.487 (0.028)*** | 1.628 (1.542–1.719) |
| Sex (male vs. female) | 0.099 (0.011)*** | 1.104 (1.080–1.128) | 0.070 (0.011)*** | 1.073 (1.050–1.097) | 0.036 (0.013)*** | 1.036 (1.011–1.062) |
| Age (1-year increase) d | –0.012 (0.000)*** | 0.988 (0.987–0.988) | –0.010 (0.000)*** | 0.990 (0.989–0.990) | –0.012 (0.000)*** | 0.988 (0.987–0.988) |
| Citizenship × sex | – | – | – | – | 0.158 (0.038)*** | 1.171 (1.086–1.262) |
| Citizenship × age | – | – | – | – | 0.009 (0.001)*** | 1.009 (1.007–1.012) |
| Sex × age | – | – | – | – | 0.003 (0.001)*** | 1.003 (1.002–1.004) |
| Citizenship × sex × age | – | – | – | – | –0.006 (0.002)*** | 0.994 (0.991–0.998) |
| Year (2024 vs. 2023) | – | – | –0.026 (0.011)* | 0.975 (0.954–0.996) | –0.026 (0.011)* | 0.975 (0.954–0.996) |
| Weekend or holiday access | – | – | –0.003 (0.012) | 0.997 (0.973–1.021) | –0.003 (0.012) | 0.997 (0.973–1.021) |
| Local health unit 1 | – | – | Reference | Reference | Reference | Reference |
| Local health unit 2 | – | – | 1.059 (0.023)*** | 2.884 (2.759–3.014) | 1.059 (0.023)*** | 2.883 (2.758–3.014) |
| Local health unit 3 | – | – | 0.442 (0.022)*** | 1.556 (1.491–1.625) | 0.441 (0.022)*** | 1.554 (1.489–1.623) |
| Local health unit 4 | – | – | 0.904 (0.026)*** | 2.470 (2.348–2.597) | 0.904 (0.026)*** | 2.470 (2.349–2.597) |
| Local health unit 5 | – | – | 0.895 (0.024)*** | 2.449 (2.338–2.565) | 0.893 (0.024)*** | 2.444 (2.333–2.559) |
| Infectious | – | – | Reference | Reference | Reference | Reference |
| Neoplasms | – | – | –0.065 (0.181)*** | 0.514 (0.361–0.733) | –0.068 (0.181)*** | 0.513 (0.360–0.730) |
| Endocrine | – | – | –1.916 (0.156)*** | 0.147 (0.108–0.200) | –1.912 (0.156)*** | 0.148 (0.109–0.201) |
| Blood | – | – | –3.087 (0.270)*** | 0.046 (0.027–0.078) | –3.075 (0.270)*** | 0.046 (0.027–0.078) |
| Mental | – | – | –0.683 (0.054)*** | 0.505 (0.455–0.561) | –0.682 (0.054)*** | 0.505 (0.455–0.561) |
| Nervous/sense | – | – | 0.865 (0.041)*** | 2.375 (2.192–2.574) | 0.862 (0.041)*** | 2.368 (2.185–2.566) |
| Circulatory | – | – | –2.046 (0.069)*** | 0.129 (0.113–0.148) | –2.043 (0.069)*** | 0.130 (0.113–0.148) |
| Respiratory | – | – | –0.797 (0.051)*** | 0.451 (0.408–0.499) | –0.795 (0.051)*** | 0.452 (0.408–0.499) |
| Digestive | – | – | –0.325 (0.046)*** | 0.723 (0.660–0.791) | –0.325 (0.046)*** | 0.723 (0.660–0.791) |
| Genitourinary | – | – | –0.613 (0.055)*** | 0.542 (0.487–0.603) | –0.611 (0.055)*** | 0.543 (0.488–0.604) |
| Pregnancy | – | – | –1.347 (0.071)*** | 0.260 (0.226–0.299) | –1.324 (0.072)*** | 0.266 (0.231–0.306) |
| Skin | – | – | 1.214 (0.046)*** | 3.368 (3.078–3.685) | 1.212 (0.046)*** | 3.359 (3.069–3.675) |
| Musculoskeletal | – | – | 0.655 (0.042)*** | 1.924 (1.773–2.089) | 0.651 (0.042)*** | 1.918 (1.767–2.082) |
| Signs/symptoms | – | – | –1.209 (0.044)*** | 0.298 (0.274–0.325) | –1.209 (0.044)*** | 0.298 (0.274–0.325) |
| Injuries/poisonings | – | – | –0.647 (0.041)*** | 0.510 (0.470–0.553) | –0.672 (0.041)*** | 0.511 (0.471–0.554) |
| Other/unspecified | – | – | 0.164 (0.041)*** | 1.179 (1.087–1.278) | 0.167 (0.041)*** | 1.182 (1.090–1.281) |
| AIC | 291,427 | | 267,338 | | 267,2012 | |
| Likelihood ratio test, *P* | < 0.001 | | < 0.001 | | < 0.001 | |
| Pseudo-*R*2 | 0.043 | | 0.244 | | 0.245 | |
| *C* index | 0.606 | | 0.752 | | 0.753 | |

a Conservatively adjusted model for age and sex only; b Fully adjusted model without interaction terms; c Fully adjusted model with interaction terms; d Age was mean-centered

*** *P* < 0.001, ** *P* < 0.01, * *P* < 0.05

*AIC* Akaike information criterion, *CI*, confidence interval, *OR* odds ratio, *SE* standard error

**Table S3** Multivariable logistic regression analysis of the association between foreign citizenship and potentially avoidable emergency department access; Liguria (Italy), 2023–2024 (*N* = 859,206). Main analysis based the broad definition of the discharge severity priority codes (non-urgency plus minor urgency codes)

| **Variable/parameter** | **Model 1 a** | | **Model 2 b** | | **Model 3 c** | |
| --- | --- | --- | --- | --- | --- | --- |
| ***b* (SE)** | **OR (95% CI)** | ***b* (SE)** | **OR (95% CI)** | ***b* (SE)** | **OR (95% CI)** |
| Intercept | 0.308 (0.003)*** | – | 0.159 (0.020)*** | – | 0.175 (0.020)*** | – |
| Citizenship (foreign vs. Italian) | 0.090 (0.007)*** | 1.094 (1.079–1.110) | 0.159 (0.008)*** | 1.172 (1.155–1.190) | 0.160 (0.014)*** | 1.174 (1.143–1.205) |
| Sex (male vs. female) | –0.048 (0.005)*** | 0.953 (0.945–0.962) | –0.025 (0.005)*** | 0.975 (0.966–0.985) | –0.052 (0.005)*** | 0.949 (0.939–0.959) |
| Age (1-year increase) d | –0.025 (0.000)*** | 0.975 (0.975–0.975) | –0.023 (0.000)*** | 0.977 (0.977–0.977) | –0.025 (0.000)*** | 0.975 (0.975–0.975) |
| Citizenship × sex | – | – | – | – | 0.124 (0.020)*** | 1.132 (1.089–1.176) |
| Citizenship × age | – | – | – | – | 0.007 (0.001)*** | 1.007 (1.005–1.008) |
| Sex × age | – | – | – | – | 0.003 (0.000)*** | 1.003 (1.003–1.004) |
| Citizenship × sex × age | – | – | – | – | –0.004 (0.001)*** | 0.996 (0.994–0.998) |
| Year (2024 vs. 2023) | – | – | 0.060 (0.005)*** | 1.061 (1.051–1.072) | 0.059 (0.005)*** | 1.061 (1.051–1.072) |
| Weekend or holiday access | – | – | –0.007 (0.005) | 0.993 (0.982–1.003) | –0.007 (0.005) | 0.993 (0.982–1.003) |
| Local health unit 1 | – | – | Reference | Reference | Reference | Reference |
| Local health unit 2 | – | – | –0.423 (0.008)*** | 0.655 (0.645–0.666) | –0.424 (0.008)*** | 0.655 (0.644–0.665) |
| Local health unit 3 | – | – | 0.100 (0.007)*** | 1.105 (1.089–1.121) | 0.099 (0.007)*** | 1.104 (1.089–1.120) |
| Local health unit 4 | – | – | 2.024 (0.013)*** | 7.571 (7.384–7.763) | 2.026 (0.013)*** | 7.582 (7.395–7.774) |
| Local health unit 5 | – | – | –0.357 (0.009)*** | 0.700 (0.688–0.712) | –0.358 (0.009)*** | 0.699 (0.687–0.711) |
| Infectious | – | – | Reference | Reference | Reference | Reference |
| Neoplasms | – | – | –1.458 (0.066)*** | 0.233 (0.205–0.265) | –1.462 (0.066)*** | 0.232 (0.204–0.264) |
| Endocrine | – | – | –0.949 (0.035)*** | 0.387 (0.361–0.414) | –0.947 (0.035)*** | 0.388 (0.362–0.415) |
| Blood | – | – | –1.292 (0.036)*** | 0.275 (0.256–0.295) | –1.288 (0.036)*** | 0.276 (0.257–0.296) |
| Mental | – | – | –0.533 (0.022)*** | 0.587 (0.562–0.613) | –0.532 (0.022)*** | 0.588 (0.562–0.614) |
| Nervous/sense | – | – | 1.175 (0.021)*** | 3.239 (3.108–3.375) | 1.175 (0.021)*** | 3.237 (3.107–3.373) |
| Circulatory | – | – | –1.241 (0.021)*** | 0.289 (0.277–0.301) | –1.241 (0.021)*** | 0.289 (0.277–0.302) |
| Respiratory | – | – | –0.953 (0.022)*** | 0.385 (0.369–0.402) | –0.953 (0.022)*** | 0.386 (0.370–0.402) |
| Digestive | – | – | –0.442 (0.021)*** | 0.643 (0.617–0.670) | –0.441 (0.021)*** | 0.643 (0.617–0.670) |
| Genitourinary | – | – | –0.290 (0.023)*** | 0.748 (0.716–0.783) | –0.295 (0.023)*** | 0.745 (0.712–0.779) |
| Pregnancy | – | – | –0.146 (0.025)*** | 0.864 (0.823–0.907) | –0.153 (0.025)*** | 0.858 (0.817–0.901) |
| Skin | – | – | 1.134 (0.030)*** | 3.108 (2.933–3.294) | 1.133 (0.030)*** | 3.106 (2.931–3.291) |
| Musculoskeletal | – | – | 1.188 (0.021)*** | 3.282 (3.146–3.423) | 1.189 (0.021)*** | 3.283 (3.148–3.425) |
| Signs/symptoms | – | – | –0.484 (0.019)*** | 0.616 (0.593–0.640) | –0.485 (0.019)*** | 0.616 (0.593–0.639) |
| Injuries/poisonings | – | – | 0.425 (0.019)*** | 1.530 (1.474–1.588) | 0.430 (0.019)*** | 1.537 (1.481–1.596) |
| Other/unspecified | – | – | 0.542 (0.020)*** | 1.719 (1.655–1.787) | 0.541 (0.020)*** | 1.718 (1.653–1.786) |
| AIC | 1,117,236 | | 978,710 | | 978,380 | |
| Likelihood ratio test, *P* | < 0.001 | | < 0.001 | | < 0.001 | |
| Pseudo-*R*2 | 0.090 | | 0.268 | | 0.269 | |
| *C* index | 0.653 | | 0.765 | | 0.765 | |

a Conservatively adjusted model for age and sex only; b Fully adjusted model without interaction terms; c Fully adjusted model with interaction terms; d Age was mean-centered

*** *P* < 0.001, ** *P* < 0.01, * *P* < 0.05

*AIC* Akaike information criterion, *CI*, confidence interval, *OR* odds ratio, *SE* standard error

**Table S3** Multivariable logistic regression analysis of the association between foreign citizenship and potentially avoidable emergency department access; Liguria (Italy), 2023–2024 (*N* = 916,568). Sensitivity analysis based the narrow definition of the entry priority codes (non-urgency white codes only)

| **Variable/parameter** | **Model 1 a** | | **Model 2 b** | | **Model 3 c** | |
| --- | --- | --- | --- | --- | --- | --- |
| ***b* (SE)** | **OR (95% CI)** | ***b* (SE)** | **OR (95% CI)** | ***b* (SE)** | **OR (95% CI)** |
| Intercept | –3.226 (0.008)*** | – | –3.678 (0.043)*** | – | –3.631 (0.043)*** | – |
| Citizenship (foreign vs. Italian) | 0.648 (0.011)*** | 1.911 (1.869–1.955) | 0.630 (0.012)*** | 1.877 (1.834–1.921) | 0.561 (0.025)*** | 1.752 (1.670–1.839) |
| Sex (male vs. female) | 0.282 (0.010)*** | 1.326 (1.302–1.352) | 0.263 (0.010)*** | 1.301 (1.276–1.326) | 0.173 (0.011)*** | 1.189 (1.163–1.216) |
| Age (1-year increase) d | –0.013 (0.000)*** | 0.987 (0.987–0.988) | –0.009 (0.000)*** | 0.991 (0.991–0.992) | –0.011 (0.000)*** | 0.989 (0.988–0.990) |
| Citizenship × sex | – | – | – | – | 0.341 (0.032)*** | 1.407 (1.321–1.498) |
| Citizenship × age | – | – | – | – | 0.013 (0.001)*** | 1.013 (1.011–1.015) |
| Sex × age | – | – | – | – | 0.002 (0.001)*** | 1.002 (1.001–1.003) |
| Citizenship × sex × age | – | – | – | – | –0.006 (0.001)*** | 0.994 (0.991–0.997) |
| Year (2024 vs. 2023) | – | – | 0.015 (0.010) | 1.015 (0.996–1.034) | 0.015 (0.010) | 1.015 (0.996–1.035) |
| Weekend or holiday access | – | – | –0.031 (0.011)** | 0.969 (0.949–0.990) | –0.032 (0.011)** | 0.968 (0.948–0.989) |
| Local health unit 1 | – | – | Reference | Reference | Reference | Reference |
| Local health unit 2 | – | – | 0.781 (0.020)*** | 2.183 (2.101–2.270) | 0.779 (0.020)*** | 2.180 (2.097–2.266) |
| Local health unit 3 | – | – | 0.352 (0.019)*** | 1.422 (1.371–1.475) | 0.348 (0.019)*** | 1.416 (1.365–1.468) |
| Local health unit 4 | – | – | 0.567 (0.023)*** | 1.763 (1.685–1.844) | 0.564 (0.023)*** | 1.757 (1.680–1.838) |
| Local health unit 5 | – | – | 0.911 (0.020)*** | 2.487 (2.392–2.586) | 0.908 (0.020)*** | 2.478 (2.383–2.577) |
| Infectious | – | – | Reference | Reference | Reference | Reference |
| Neoplasms | – | – | –0.179 (0.142) | 0.836 (0.633–1.104) | –0.177 (0.142) | 0.838 (0.634–1.107) |
| Endocrine | – | – | –1.673 (0.138)*** | 0.188 (0.143–0.246) | –1.672 (0.138)*** | 0.188 (0.144–0.246) |
| Blood | – | – | –2.675 (0.217)*** | 0.069 (0.045–0.105) | –2.655 (0.217)*** | 0.070 (0.046–0.108) |
| Mental | – | – | –1.242 (0.061)*** | 0.289 (0.256–0.325) | –1.244 (0.061)*** | 0.288 (0.256–0.325) |
| Nervous/sense | – | – | 0.792 (0.041)*** | 2.207 (2.038–2.390) | 0.785 (0.041)*** | 2.193 (2.025–2.375) |
| Circulatory | – | – | –2.273 (0.073)*** | 0.103 (0.089–0.119) | –2.267 (0.073)*** | 0.104 (0.090–0.120) |
| Respiratory | – | – | –0.819 (0.051)*** | 0.441 (0.399–0.487) | –0.815 (0.051)*** | 0.443 (0.401–0.489) |
| Digestive | – | – | –0.177 (0.045)*** | 0.838 (0.768–0.915) | –0.177 (0.045)*** | 0.838 (0.768–0.915) |
| Genitourinary | – | – | –0.706 (0.055)*** | 0.493 (0.443–0.550) | –0.690 (0.055)*** | 0.502 (0.450–0.559) |
| Pregnancy | – | – | –1.195 (0.068)*** | 0.303 (0.265–0.346) | –1.131 (0.068)*** | 0.323 (0.282–0.369) |
| Skin | – | – | 1.341 (0.045)*** | 3.824 (3.501–4.175) | 1.337 (0.045)*** | 3.807 (3.486–4.157) |
| Musculoskeletal | – | – | 0.545 (0.042)*** | 1.725 (1.590–1.871) | 0.537 (0.042)*** | 1.710 (1.576–1.855) |
| Signs/symptoms | – | – | –1.383 (0.044)*** | 0.251 (0.230–0.274) | –1.381 (0.044)*** | 0.251 (0.230–0.274) |
| Injuries/poisonings | – | – | –0.571 (0.040)*** | 0.565 (0.522–0.611) | –0.576 (0.041)*** | 0.562 (0.519–0.609) |
| Other/unspecified | – | – | 0.717 (0.039)*** | 2.049 (1.896–2.213) | 0.718 (0.039)*** | 2.050 (1.898–2.214) |
| AIC | 364,351 | | 331,590 | | 331,099 | |
| Likelihood ratio test, *P* | < 0.001 | | < 0.001 | | < 0.001 | |
| Pseudo-*R*2 | 0.068 | | 0.269 | | 0.272 | |
| *C* index | 0.628 | | 0.764 | | 0.765 | |

a Conservatively adjusted model for age and sex only; b Fully adjusted model without interaction terms; c Fully adjusted model with interaction terms; d Age was mean-centered

*** *P* < 0.001, ** *P* < 0.01, * *P* < 0.05

*AIC* Akaike information criterion, *CI*, confidence interval, *OR* odds ratio, *SE* standard error

**Table S4** Multivariable logistic regression analysis of the association between foreign citizenship and potentially avoidable emergency department access; Liguria (Italy), 2023–2024 (*N* = 916,568). Sensitivity analysis based the broad definition of the entry priority codes (non-urgency white plus minor urgency green codes)

| **Variable/parameter** | **Model 1 a** | | **Model 2 b** | | **Model 3 c** | |
| --- | --- | --- | --- | --- | --- | --- |
| ***b* (SE)** | **OR (95% CI)** | ***b* (SE)** | **OR (95% CI)** | ***b* (SE)** | **OR (95% CI)** |
| Intercept | –0.303 (0.003)*** | – | –0.794 (0.019)*** | – | –0.776 (0.019)*** | – |
| Citizenship (foreign vs. Italian) | 0.068 (0.006)*** | 1.071 (1.057–1.084) | 0.125 (0.007)*** | 1.133 (1.117–1.148) | 0.102 (0.013)*** | 1.108 (1.080–1.137) |
| Sex (male vs. female) | 0.018 (0.004)*** | 1.018 (1.009–1.027) | 0.023 (0.005)*** | 1.023 (1.013–1.033) | –0.011 (0.005)* | 0.989 (0.979–0.999) |
| Age (1-year increase) d | –0.025 (0.000)*** | 0.975 (0.975–0.976) | –0.023 (0.000)*** | 0.978 (0.977–0.978) | –0.025 (0.000)*** | 0.975 (0.975–0.976) |
| Citizenship × sex | – | – | – | – | 0.236 (0.019)*** | 1.266 (1.221–1.313) |
| Citizenship × age | – | – | – | – | 0.008 (0.001)*** | 1.008 (1.007–1.009) |
| Sex × age | – | – | – | – | 0.004 (0.000)*** | 1.004 (1.004–1.005) |
| Citizenship × sex × age | – | – | – | – | –0.002 (0.001)** | 0.998 (0.996–0.999) |
| Year (2024 vs. 2023) | – | – | 0.014 (0.005)** | 1.014 (1.004–1.023) | 0.014 (0.005)** | 1.014 (1.004–1.023) |
| Weekend or holiday access | – | – | –0.063 (0.005)*** | 0.939 (0.930–0.949) | –0.063 (0.005)*** | 0.939 (0.930–0.949) |
| Local health unit 1 | – | – | Reference | Reference | Reference | Reference |
| Local health unit 2 | – | – | 0.593 (0.008)*** | 1.809 (1.779–1.839) | 0.592 (0.008)*** | 1.808 (1.778–1.838) |
| Local health unit 3 | – | – | 0.319 (0.008)*** | 1.376 (1.355–1.396) | 0.317 (0.008)*** | 1.373 (1.353–1.394) |
| Local health unit 4 | – | – | 1.195 (0.010)*** | 3.304 (3.239–3.371) | 1.195 (0.010)*** | 3.303 (3.237–3.369) |
| Local health unit 5 | – | – | 0.502 (0.009)*** | 1.652 (1.624–1.682) | 0.502 (0.009)*** | 1.651 (1.622–1.681) |
| Infectious | – | – | Reference | Reference | Reference | Reference |
| Neoplasms | – | – | –0.873 (0.067)*** | 0.418 (0.366–0.477) | –0.878 (0.068)*** | 0.416 (0.364–0.474) |
| Endocrine | – | – | –1.190 (0.040)*** | 0.304 (0.281–0.329) | –1.187 (0.040)*** | 0.305 (0.282–0.330) |
| Blood | – | – | –1.718 (0.047)*** | 0.179 (0.164–0.197) | –1.711 (0.047)*** | 0.181 (0.165–0.198) |
| Mental | – | – | –0.954 (0.023)*** | 0.385 (0.368–0.403) | –0.954 (0.023)*** | 0.385 (0.368–0.403) |
| Nervous/sense | – | – | 1.365 (0.020)*** | 3.914 (3.763–4.071) | 1.364 (0.020)*** | 3.912 (3.761–4.069) |
| Circulatory | – | – | –1.690 (0.023)*** | 0.185 (0.176–0.193) | –1.689 (0.023)*** | 0.185 (0.176–0.193) |
| Respiratory | – | – | –0.854 (0.022)*** | 0.426 (0.408–0.444) | –0.853 (0.022)*** | 0.426 (0.408–0.445) |
| Digestive | – | – | –0.515 (0.021)*** | 0.598 (0.574–0.622) | –0.515 (0.021)*** | 0.598 (0.574–0.622) |
| Genitourinary | – | – | –0.298 (0.023)*** | 0.742 (0.710–0.776) | –0.303 (0.023)*** | 0.738 (0.706–0.772) |
| Pregnancy | – | – | –0.001 (0.024) | 0.999 (0.953–1.047) | –0.007 (0.024) | 0.993 (0.947–1.041) |
| Skin | – | – | 1.233 (0.027)*** | 3.433 (3.255–3.621) | 1.232 (0.027)*** | 3.429 (3.251–3.617) |
| Musculoskeletal | – | – | 1.119 (0.020)*** | 3.063 (2.943–3.188) | 1.120 (0.020)*** | 3.064 (2.943–3.189) |
| Signs/symptoms | – | – | –1.023 (0.019)*** | 0.360 (0.346–0.373) | –1.024 (0.019)*** | 0.359 (0.346–0.373) |
| Injuries/poisonings | – | – | 0.423 (0.018)*** | 1.526 (1.472–1.583) | 0.429 (0.018)*** | 1.535 (1.481–1.592) |
| Other/unspecified | – | – | 0.492 (0.019)*** | 1.635 (1.576–1.696) | 0.490 (0.019)*** | 1.632 (1.574–1.693) |
| AIC | 1,192,893 | | 1,047,370 | | 1,046,603 | |
| Likelihood ratio test, *P* | < 0.001 | | < 0.001 | | < 0.001 | |
| Pseudo-*R*2 | 0.087 | | 0.264 | | 0.265 | |
| *C* index | 0.651 | | 0.765 | | 0.766 | |

a Conservatively adjusted model for age and sex only; b Fully adjusted model without interaction terms; c Fully adjusted model with interaction terms; d Age was mean-centered

*** *P* < 0.001, ** *P* < 0.01, * *P* < 0.05

*AIC* Akaike information criterion, *CI*, confidence interval, *OR* odds ratio, *SE* standard error
